# INFOGRAPHICS IN ANESTHESIOLOGY

Complex Information for Anesthesiologists Presented Quickly and Clearly

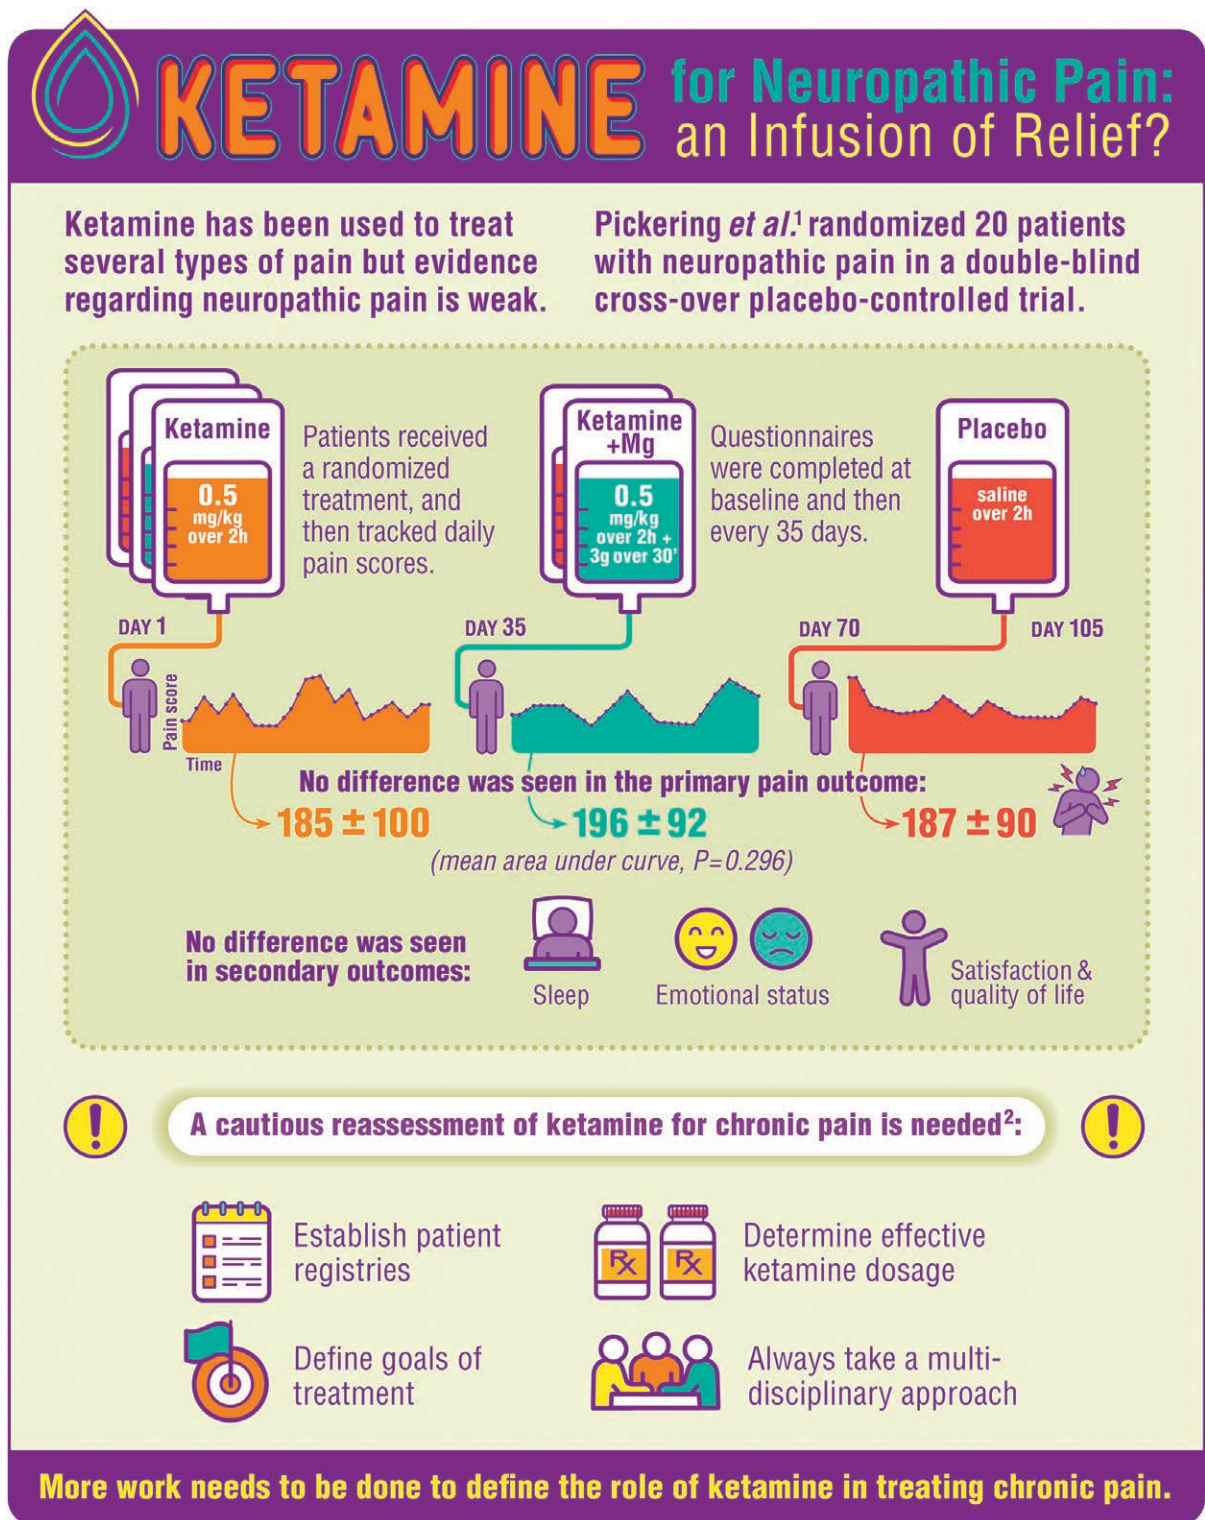

Infographic created by Jonathan P. Wanderer, Vanderbilt University Medical Center, and James P. Rathmell, Brigham and Women's Health Care/Harvard Medical School. Illustration by Annemarie Johnson, Vivo Visuals. Address correspondence to Dr. Wanderer: jon.wanderer@vumc.org.

1. Pickering G, Pereira B, Morel V, Corrigan A, Giron F, Marcaillou F, Bidar-Beauvallon A, Chandeze E, Lambert C, Bernard L, Delage N. Ketamine and magnesium for refractory neuropathic pain: A randomized, double-blind, crossover trial. *ANESTHESIOLOGY* 2020; 133:154–64
2. Clark JD. Ketamine for chronic pain: Old drug new trick? *ANESTHESIOLOGY* 2020; 133:13–5
